# Supplementary material
Source: Springer Nature journal article supplement (https://www.springermedizin.de/resource/supplementary/13012_2009_169_MOESM3_ESM.pdf/9629390)
Supplement: MOESM3 [file 9629390]

Potentially relevant references  
identified by search and screened  
**n = 5,260**

References excluded at  
electronic screening stage  
**n = 5,250**

References retrieved for more  
detailed evaluation  
**n = 112**  
(10 identified by original search,  
102 identified from reference lists  
of retrieved papers)

References excluded at abstract  
screening stage  
**n = 32**

References retrieved for full paper  
review  
**n = 80**

References excluded following  
full paper review  
**n = 65**

Number of references identified by  
search meeting inclusion criteria  
**n = 15**
